# Supplementary material
Source: publisher figshare collection journal article supplement (https://geolsoc.figshare.com/ndownloader/files/30667983)
Supplement: Supplementary file 1 [file 30667983]

| Labels | 206Pbc(1) | U | Th | Th/U | 238U/206Pb* (1) | | | 207Pb*/206Pb* (1) | | | 238U/206Pb* age (1) | | | 238U/206Pb* age (2) | | | 207Pb*/206Pb* age (1) | | | Disc (3) |
| --- | --- | --- | --- | --- | --- | --- | --- | --- | --- | --- | --- | --- | --- | --- | --- | --- | --- | --- | --- | --- |
|  | (%) | (ppm) | (ppm) |  |  | | |  | | | (Ma) | | | (Ma) | | | (Ma) | | | (%) |
| D2_001 | 0.00 | 945 | 859 | 0.93 | 9.75 | ± | 0.12 | 0.0797 | ± | 0.0012 | 629.6 | ± | 7.5 | 615.7 | ± | 7.4 | 1190 | ± | 29 | 47.10 |
| D2_002 | 0.00 | 216 | 67 | 0.32 | 3.25 | ± | 0.04 | 0.1121 | ± | 0.0012 | 1729.6 | ± | 16.4 | 1718.8 | ± | 16.5 | 1834 | ± | 19 | 5.69 |
| D2_003 | 0.00 | 313 | 55 | 0.18 | 13.68 | ± | 0.18 | 0.0574 | ± | 0.0013 | 454.9 | ± | 5.7 | 454.2 | ± | 5.7 | 506 | ± | 50 | 10.09 |
| D2_004 | 0.23 | 435 | 282 | 0.67 | 2.10 | ± | 0.03 | 0.1671 | ± | 0.0016 | 2510.4 | ± | 27.6 | 2507.2 | ± | 27.7 | 2530 | ± | 16 | 0.78 |
| D2_005 | 0.00 | 168 | 182 | 1.11 | 110.79 | ± | 3.04 | 0.0563 | ± | 0.0045 | 57.9 | ± | 1.6 | 57.3 | ± | 1.6 | 464 | ± | 169 | 87.52 |
| D2_006 | 1.87 | 603 | 359 | 0.61 | 101.90 | ± | 2.09 | 0.0418 | ± | 0.0055 | 63.0 | ± | 1.3 | 63.4 | ± | 1.3 |  |  |  |  |
| D2_007 | 0.00 | 649 | 96 | 0.15 | 5.88 | ± | 0.05 | 0.0757 | ± | 0.0008 | 1011.8 | ± | 8.3 | 1008.7 | ± | 8.3 | 1088 | ± | 22 | 7.00 |
| D2_008 | 0.00 | 1439 | 957 | 0.68 | 64.99 | ± | 0.74 | 0.0500 | ± | 0.0012 | 98.4 | ± | 1.1 | 98.2 | ± | 1.1 | 194 | ± | 54 | 49.26 |
| D2_009 | 0.63 | 296 | 94 | 0.33 | 10.19 | ± | 0.11 | 0.0635 | ± | 0.0025 | 603.7 | ± | 6.5 | 601.3 | ± | 6.4 | 726 | ± | 81 | 16.85 |
| D2_010 | 0.00 | 694 | 591 | 0.87 | 13.22 | ± | 0.15 | 0.0623 | ± | 0.0011 | 470.0 | ± | 5.3 | 466.8 | ± | 5.3 | 684 | ± | 37 | 31.28 |
| D2_011 | 0.00 | 238 | 82 | 0.35 | 9.68 | ± | 0.11 | 0.0630 | ± | 0.0016 | 633.8 | ± | 6.8 | 632.3 | ± | 6.8 | 708 | ± | 52 | 10.47 |
| D2_012 | 0.00 | 163 | 7 | 0.05 | 2.01 | ± | 0.02 | 0.1896 | ± | 0.0016 | 2603.0 | ± | 24.2 | 2567.2 | ± | 24.2 | 2740 | ± | 14 | 5.00 |
| D2_013 | 0.17 | 161 | 66 | 0.42 | 3.05 | ± | 0.03 | 0.1120 | ± | 0.0018 | 1827.9 | ± | 17.6 | 1827.7 | ± | 17.8 | 1834 | ± | 29 | 0.33 |
| D2_014 | 0.38 | 725 | 76 | 0.11 | 15.31 | ± | 0.16 | 0.1139 | ± | 0.0014 | 408.0 | ± | 4.2 | 379.1 | ± | 4.0 | 1863 | ± | 22 | 78.10 |
| D2_015 | 0.30 | 150 | 92 | 0.63 | 2.87 | ± | 0.04 | 0.1697 | ± | 0.0035 | 1926.7 | ± | 22.1 | 1828.4 | ± | 20.9 | 2556 | ± | 34 | 24.62 |
| D2_016 | 0.51 | 212 | 75 | 0.36 | 7.39 | ± | 0.09 | 0.0686 | ± | 0.0024 | 818.1 | ± | 9.7 | 816.2 | ± | 9.6 | 887 | ± | 71 | 7.76 |
| D2_017 | 0.00 | 233 | 191 | 0.84 | 4.39 | ± | 0.05 | 0.0852 | ± | 0.0012 | 1322.8 | ± | 13.7 | 1322.8 | ± | 13.7 | 1321 | ± | 28 | -0.14 |
| D2_018 | 0.00 | 303 | 332 | 1.13 | 5.17 | ± | 0.07 | 0.0757 | ± | 0.0011 | 1140.8 | ± | 15.1 | 1140.8 | ± | 15.1 | 1087 | ± | 28 | -4.95 |
| D2_019 | 0.00 | 1209 | 1757 | 1.49 | 58.52 | ± | 0.65 | 0.0518 | ± | 0.0015 | 109.2 | ± | 1.2 | 108.7 | ± | 1.2 | 279 | ± | 64 | 60.85 |
| D2_020 | 0.93 | 727 | 410 | 0.58 | 6.54 | ± | 0.07 | 0.1055 | ± | 0.0025 | 917.5 | ± | 9.6 | 880.8 | ± | 9.3 | 1724 | ± | 44 | 46.78 |
| D2_021 | 0.37 | 250 | 164 | 0.67 | 7.22 | ± | 0.09 | 0.0672 | ± | 0.0022 | 835.9 | ± | 9.5 | 835.7 | ± | 9.5 | 845 | ± | 65 | 1.08 |
| D2_022 | 0.36 | 760 | 461 | 0.62 | 132.64 | ± | 2.41 | 0.0555 | ± | 0.0053 | 48.4 | ± | 0.9 | 47.9 | ± | 0.9 | 432 | ± | 200 | 88.79 |
| D2_023 | 0.00 | 204 | 73 | 0.37 | 3.12 | ± | 0.04 | 0.1038 | ± | 0.0013 | 1790.9 | ± | 19.7 | 1790.9 | ± | 19.7 | 1694 | ± | 23 | -5.72 |
| D2_024 | 0.06 | 329 | 156 | 0.49 | 2.15 | ± | 0.03 | 0.1659 | ± | 0.0019 | 2463.2 | ± | 31.3 | 2451.5 | ± | 31.3 | 2518 | ± | 19 | 2.18 |
| D2_025 | 0.00 | 1077 | 684 | 0.65 | 5.25 | ± | 0.10 | 0.0902 | ± | 0.0010 | 1124.1 | ± | 19.3 | 1108.1 | ± | 19.1 | 1431 | ± | 21 | 21.45 |
| D2_026 | 0.42 | 471 | 216 | 0.47 | 2.23 | ± | 0.03 | 0.1690 | ± | 0.0022 | 2384.4 | ± | 30.4 | 2351.0 | ± | 30.2 | 2549 | ± | 22 | 6.46 |
| D2_027 | 0.00 | 251 | 51 | 0.21 | 12.70 | ± | 0.19 | 0.0592 | ± | 0.0015 | 488.8 | ± | 6.9 | 487.5 | ± | 6.9 | 575 | ± | 54 | 15.00 |
| D2_028 | 0.19 | 423 | 268 | 0.65 | 61.72 | ± | 1.09 | 0.0502 | ± | 0.0047 | 103.6 | ± | 1.8 | 103.3 | ± | 1.8 | 203 | ± | 204 | 48.96 |
| D2_029 | 0.78 | 323 | 117 | 0.37 | 6.94 | ± | 0.08 | 0.0754 | ± | 0.0021 | 868.0 | ± | 9.9 | 860.9 | ± | 9.8 | 1080 | ± | 55 | 19.63 |
| D2_030 | 0.31 | 532 | 149 | 0.29 | 11.85 | ± | 0.15 | 0.0565 | ± | 0.0013 | 522.2 | ± | 6.2 | 523.0 | ± | 6.2 | 475 | ± | 48 | -9.93 |
| D2_031 | 0.10 | 1138 | 1617 | 1.46 | 6.86 | ± | 0.07 | 0.0720 | ± | 0.0039 | 877.3 | ± | 8.9 | 873.6 | ± | 8.2 | 988 | ± | 107 | 11.20 |
| D2_032 | 0.21 | 966 | 82 | 0.09 | 12.64 | ± | 0.16 | 0.0550 | ± | 0.0011 | 490.8 | ± | 5.9 | 491.8 | ± | 5.9 | 412 | ± | 45 | -19.13 |
| D2_033 | 0.50 | 504 | 54 | 0.11 | 5.80 | ± | 0.08 | 0.0767 | ± | 0.0011 | 1025.8 | ± | 13.2 | 1022.3 | ± | 13.2 | 1115 | ± | 29 | 8.00 |
| D2_034 | 0.10 | 363 | 83 | 0.23 | 1.98 | ± | 0.02 | 0.1880 | ± | 0.0017 | 2633.7 | ± | 21.9 | 2609.9 | ± | 22.0 | 2726 | ± | 15 | 3.39 |
| D2_035 | 0.00 | 402 | 235 | 0.60 | 7.37 | ± | 0.09 | 0.0674 | ± | 0.0010 | 819.8 | ± | 9.2 | 818.9 | ± | 9.2 | 851 | ± | 29 | 3.67 |
| D2_036 | 0.03 | 247 | 89 | 0.37 | 4.81 | ± | 0.06 | 0.0821 | ± | 0.0016 | 1218.4 | ± | 12.9 | 1216.8 | ± | 12.9 | 1249 | ± | 39 | 2.45 |
| D2_037 | 0.00 | 91 | 41 | 0.46 | 6.24 | ± | 0.10 | 0.0750 | ± | 0.0021 | 957.7 | ± | 14.6 | 953.4 | ± | 14.7 | 1069 | ± | 56 | 10.41 |
| D2_038 | 0.00 | 406 | 246 | 0.62 | 10.68 | ± | 0.12 | 0.0601 | ± | 0.0010 | 576.8 | ± | 6.3 | 576.3 | ± | 6.4 | 609 | ± | 35 | 5.28 |
| D2_039 | 0.00 | 644 | 141 | 0.22 | 9.85 | ± | 0.12 | 0.0620 | ± | 0.0009 | 623.6 | ± | 7.3 | 622.6 | ± | 7.3 | 674 | ± | 30 | 7.47 |
| D2_040 | 0.00 | 301 | 161 | 0.55 | 6.16 | ± | 0.08 | 0.0723 | ± | 0.0011 | 969.1 | ± | 11.3 | 968.1 | ± | 11.3 | 995 | ± | 30 | 2.60 |
| D2_041 | 0.40 | 153 | 70 | 0.47 | 13.19 | ± | 0.20 | 0.0576 | ± | 0.0030 | 471.2 | ± | 6.7 | 470.6 | ± | 6.7 | 514 | ± | 110 | 8.33 |
| D2_042 | 0.00 | 352 | 100 | 0.29 | 2.85 | ± | 0.03 | 0.1132 | ± | 0.0010 | 1939.0 | ± | 18.7 | 1939.0 | ± | 18.7 | 1853 | ± | 16 | -4.64 |
| D2_043 | 0.00 | 852 | 1558 | 1.88 | 13.90 | ± | 0.15 | 0.1797 | ± | 0.0018 | 447.9 | ± | 4.8 | 381.4 | ± | 4.2 | 2651 | ± | 17 | 83.10 |
| D2_044 | 0.04 | 1211 | 194 | 0.16 | 5.52 | ± | 0.07 | 0.0783 | ± | 0.0008 | 1072.8 | ± | 12.8 | 1069.1 | ± | 12.8 | 1156 | ± | 21 | 7.20 |
| D2_045 | 0.00 | 1540 | 865 | 0.58 | 7.28 | ± | 0.09 | 0.1107 | ± | 0.0010 | 830.2 | ± | 9.9 | 788.8 | ± | 9.4 | 1812 | ± | 16 | 54.18 |
| D2_046 | 0.00 | 956 | 1035 | 1.11 | 6.48 | ± | 0.08 | 0.0707 | ± | 0.0008 | 925.5 | ± | 10.3 | 924.7 | ± | 10.3 | 950 | ± | 22 | 2.57 |
| D2_047 | 0.08 | 335 | 156 | 0.48 | 6.09 | ± | 0.07 | 0.0709 | ± | 0.0016 | 980.0 | ± | 9.9 | 980.7 | ± | 9.8 | 955 | ± | 46 | -2.62 |
| D2_048 | 0.00 | 1642 | 124 | 0.08 | 10.33 | ± | 0.10 | 0.1220 | ± | 0.0010 | 595.7 | ± | 5.4 | 552.2 | ± | 5.0 | 1987 | ± | 15 | 70.02 |
| D2_049 | 0.05 | 317 | 309 | 1.00 | 7.36 | ± | 0.09 | 0.0672 | ± | 0.0020 | 821.5 | ± | 9.8 | 820.9 | ± | 9.7 | 845 | ± | 62 | 2.78 |
| D2_050 | 0.00 | 969 | 190 | 0.20 | 9.91 | ± | 0.12 | 0.0606 | ± | 0.0008 | 619.5 | ± | 7.3 | 619.4 | ± | 7.4 | 624 | ± | 28 | 0.73 |
| D2_051 | 0.00 | 95 | 39 | 0.42 | 60.43 | ± | 3.02 | 0.0716 | ± | 0.0057 | 105.8 | ± | 5.2 | 102.7 | ± | 5.2 | 976 | ± | 155 | 89.16 |
| D2_052 | 0.50 | 255 | 57 | 0.23 | 12.87 | ± | 0.21 | 0.0685 | ± | 0.0023 | 482.4 | ± | 7.6 | 475.7 | ± | 7.5 | 883 | ± | 69 | 45.37 |
| D2_053 | 0.00 | 331 | 163 | 0.50 | 2.26 | ± | 0.03 | 0.1763 | ± | 0.0015 | 2361.7 | ± | 22.8 | 2306.2 | ± | 22.6 | 2619 | ± | 15 | 9.82 |
| D2_054 | 0.00 | 291 | 262 | 0.92 | 5.99 | ± | 0.08 | 0.1004 | ± | 0.0014 | 995.7 | ± | 12.0 | 964.7 | ± | 11.7 | 1632 | ± | 26 | 38.99 |
| D2_055 | 0.00 | 656 | 124 | 0.19 | 4.72 | ± | 0.07 | 0.0994 | ± | 0.0012 | 1239.5 | ± | 15.9 | 1216.0 | ± | 15.7 | 1613 | ± | 22 | 23.15 |
| D2_056 | 1.94 | 1064 | 307 | 0.30 | 21.20 | ± | 0.28 | 0.1057 | ± | 0.0019 | 297.1 | ± | 3.8 | 277.8 | ± | 3.6 | 1727 | ± | 33 | 82.80 |
| D2_057 | 0.00 | 343 | 138 | 0.41 | 12.65 | ± | 0.16 | 0.0569 | ± | 0.0012 | 490.4 | ± | 6.0 | 490.4 | ± | 6.0 | 489 | ± | 47 | -0.28 |
| D2_058 | 1.93 | 840 | 95 | 0.12 | 13.64 | ± | 0.15 | 0.1019 | ± | 0.0017 | 456.1 | ± | 5.0 | 431.3 | ± | 4.8 | 1660 | ± | 30 | 72.53 |
| D2_059 | 0.46 | 746 | 690 | 0.95 | 13.47 | ± | 0.15 | 0.0549 | ± | 0.0023 | 461.5 | ± | 5.1 | 462.3 | ± | 5.0 | 407 | ± | 90 | -13.39 |
| D2_060 | 0.00 | 523 | 183 | 0.36 | 5.00 | ± | 0.05 | 0.0997 | ± | 0.0009 | 1175.8 | ± | 10.4 | 1149.6 | ± | 10.2 | 1619 | ± | 17 | 27.37 |
| D2_061 | 0.00 | 1578 | 304 | 0.20 | 2.92 | ± | 0.03 | 0.1166 | ± | 0.0009 | 1895.7 | ± | 16.0 | 1894.7 | ± | 16.1 | 1905 | ± | 13 | 0.49 |
| D2_062 | 0.00 | 683 | 405 | 0.61 | 9.58 | ± | 0.10 | 0.0634 | ± | 0.0008 | 639.9 | ± | 6.3 | 638.1 | ± | 6.3 | 721 | ± | 28 | 11.25 |
| D2_063 | 0.00 | 499 | 1405 | 2.89 | 11.09 | ± | 0.13 | 0.0603 | ± | 0.0011 | 556.6 | ± | 6.2 | 555.6 | ± | 6.2 | 614 | ± | 39 | 9.35 |
| D2_064 | 0.09 | 500 | 38 | 0.08 | 5.22 | ± | 0.08 | 0.1201 | ± | 0.0013 | 1128.9 | ± | 15.0 | 1076.2 | ± | 14.4 | 1958 | ± | 19 | 42.34 |
| D2_065 | 0.00 | 148 | 62 | 0.43 | 2.16 | ± | 0.03 | 0.1460 | ± | 0.0015 | 2455.1 | ± | 25.7 | 2455.1 | ± | 25.7 | 2301 | ± | 17 | -6.70 |
| D2_066 | 0.00 | 404 | 137 | 0.35 | 5.51 | ± | 0.06 | 0.0756 | ± | 0.0009 | 1074.7 | ± | 11.4 | 1074.3 | ± | 11.5 | 1084 | ± | 24 | 0.86 |
| D2_067 | 0.37 | 712 | 396 | 0.57 | 14.10 | ± | 0.14 | 0.0559 | ± | 0.0021 | 441.8 | ± | 4.3 | 441.7 | ± | 4.3 | 450 | ± | 82 | 1.82 |
| D2_068 | 0.00 | 874 | 496 | 0.58 | 6.13 | ± | 0.10 | 0.1128 | ± | 0.0011 | 974.4 | ± | 14.6 | 929.5 | ± | 14.1 | 1847 | ± | 18 | 47.25 |
| D2_069 | 0.21 | 93 | 57 | 0.62 | 7.16 | ± | 0.11 | 0.0709 | ± | 0.0040 | 843.1 | ± | 12.4 | 839.6 | ± | 12.3 | 955 | ± | 111 | 11.72 |
| D2_070 | 0.36 | 549 | 298 | 0.56 | 11.86 | ± | 0.14 | 0.0543 | ± | 0.0018 | 521.8 | ± | 5.8 | 523.6 | ± | 5.8 | 352 | ± | 72 | -48.24 |
| D2_071 | 0.57 | 1371 | 33 | 0.02 | 25.13 | ± | 0.25 | 0.0540 | ± | 0.0009 | 251.5 | ± | 2.5 | 250.7 | ± | 2.5 | 372 | ± | 39 | 32.39 |
| D2_072 | 0.30 | 343 | 161 | 0.48 | 5.61 | ± | 0.07 | 0.0755 | ± | 0.0016 | 1057.5 | ± | 12.4 | 1056.6 | ± | 12.5 | 1082 | ± | 43 | 2.27 |
| D2_073 | 0.00 | 237 | 190 | 0.82 | 3.01 | ± | 0.05 | 0.1235 | ± | 0.0015 | 1850.2 | ± | 26.7 | 1831.2 | ± | 26.6 | 2008 | ± | 22 | 7.86 |
| D2_074 | 0.51 | 373 | 250 | 0.69 | 3.48 | ± | 0.04 | 0.1075 | ± | 0.0024 | 1629.1 | ± | 17.1 | 1617.8 | ± | 16.8 | 1758 | ± | 41 | 7.33 |
| D2_075 | 0.00 | 767 | 470 | 0.63 | 53.81 | ± | 0.69 | 0.0512 | ± | 0.0017 | 118.7 | ± | 1.5 | 118.3 | ± | 1.5 | 251 | ± | 74 | 52.70 |
| D2_076 | 0.20 | 136 | 50 | 0.38 | 3.19 | ± | 0.05 | 0.1128 | ± | 0.0018 | 1758.5 | ± | 24.9 | 1749.5 | ± | 24.9 | 1847 | ± | 28 | 4.79 |
| D2_077 | 0.00 | 588 | 479 | 0.84 | 226.95 | ± | 5.37 | 0.0643 | ± | 0.0045 | 28.3 | ± | 0.7 | 27.7 | ± | 0.7 | 753 | ± | 140 | 96.24 |
| D2_078 | 0.00 | 928 | 578 | 0.64 | 5.72 | ± | 0.06 | 0.0751 | ± | 0.0008 | 1038.2 | ± | 10.2 | 1036.8 | ± | 10.2 | 1072 | ± | 20 | 3.16 |
| D2_079 | 0.03 | 638 | 126 | 0.20 | 3.14 | ± | 0.03 | 0.1085 | ± | 0.0010 | 1782.1 | ± | 14.9 | 1782.7 | ± | 14.9 | 1775 | ± | 17 | -0.40 |
| D2_080 | 0.78 | 311 | 117 | 0.39 | 7.25 | ± | 0.11 | 0.0749 | ± | 0.0021 | 833.4 | ± | 11.7 | 826.0 | ± | 11.6 | 1067 | ± | 57 | 21.89 |
| D2_081 | 0.00 | 1396 | 1456 | 1.07 | 55.21 | ± | 0.60 | 0.0524 | ± | 0.0012 | 115.7 | ± | 1.3 | 115.1 | ± | 1.3 | 303 | ± | 51 | 61.81 |
| D2_082 | 0.00 | 671 | 278 | 0.43 | 3.03 | ± | 0.04 | 0.1132 | ± | 0.0009 | 1841.0 | ± | 22.4 | 1839.7 | ± | 22.4 | 1853 | ± | 14 | 0.65 |
| D2_083 | 0.00 | 670 | 398 | 0.61 | 9.34 | ± | 0.12 | 0.0653 | ± | 0.0011 | 655.4 | ± | 8.1 | 652.5 | ± | 8.1 | 786 | ± | 36 | 16.61 |
| D2_084 | 0.00 | 324 | 81 | 0.26 | 3.04 | ± | 0.04 | 0.1119 | ± | 0.0012 | 1831.8 | ± | 18.6 | 1831.8 | ± | 18.6 | 1832 | ± | 19 | 0.01 |
| D2_085 | 0.00 | 180 | 199 | 1.13 | 54.90 | ± | 1.34 | 0.0643 | ± | 0.0042 | 116.4 | ± | 2.8 | 114.0 | ± | 2.8 | 751 | ± | 134 | 84.51 |
| D2_086 | 0.04 | 396 | 88 | 0.23 | 7.17 | ± | 0.09 | 0.0713 | ± | 0.0016 | 841.9 | ± | 9.7 | 838.0 | ± | 9.7 | 967 | ± | 46 | 12.93 |
| D2_087 | 0.00 | 323 | 112 | 0.35 | 3.48 | ± | 0.04 | 0.1130 | ± | 0.0012 | 1627.1 | ± | 16.3 | 1605.8 | ± | 16.2 | 1849 | ± | 19 | 12.00 |
| D2_088 | 0.00 | 106 | 93 | 0.90 | 3.08 | ± | 0.04 | 0.1147 | ± | 0.0019 | 1810.5 | ± | 21.9 | 1803.3 | ± | 22.0 | 1876 | ± | 29 | 3.49 |
| D2_089 | 0.00 | 460 | 376 | 0.84 | 2.28 | ± | 0.03 | 0.1569 | ± | 0.0015 | 2345.7 | ± | 25.7 | 2330.3 | ± | 25.7 | 2424 | ± | 16 | 3.23 |
| D2_090 | 0.00 | 567 | 380 | 0.69 | 4.63 | ± | 0.04 | 0.0981 | ± | 0.0017 | 1261.7 | ± | 10.9 | 1240.8 | ± | 11.0 | 1589 | ± | 33 | 20.60 |
| D2_091 | 0.78 | 841 | 332 | 0.40 | 3.52 | ± | 0.05 | 0.1064 | ± | 0.0011 | 1611.9 | ± | 19.6 | 1601.2 | ± | 19.5 | 1740 | ± | 19 | 7.36 |
| D2_092 | 0.26 | 296 | 81 | 0.28 | 6.66 | ± | 0.09 | 0.0670 | ± | 0.0017 | 901.8 | ± | 11.3 | 903.9 | ± | 11.3 | 838 | ± | 52 | -7.61 |
| D2_093 | 0.10 | 339 | 83 | 0.25 | 3.37 | ± | 0.05 | 0.1123 | ± | 0.0013 | 1674.7 | ± | 20.0 | 1658.6 | ± | 19.9 | 1838 | ± | 22 | 8.88 |
| D2_094 | 0.96 | 865 | 448 | 0.53 | 12.64 | ± | 0.23 | 0.0966 | ± | 0.0019 | 490.7 | ± | 8.6 | 467.7 | ± | 8.2 | 1560 | ± | 37 | 68.54 |
| D2_095 | 0.92 | 210 | 130 | 0.63 | 7.21 | ± | 0.12 | 0.0624 | ± | 0.0025 | 837.2 | ± | 13.3 | 841.7 | ± | 13.4 | 622 | ± | 91 | -34.59 |
| D2_096 | 0.45 | 548 | 130 | 0.24 | 4.38 | ± | 0.05 | 0.1189 | ± | 0.0019 | 1325.8 | ± | 13.8 | 1278.9 | ± | 13.5 | 1940 | ± | 29 | 31.66 |
| D2_097 | 0.17 | 806 | 74 | 0.09 | 3.47 | ± | 0.05 | 0.1128 | ± | 0.0010 | 1633.5 | ± | 19.4 | 1613.3 | ± | 19.3 | 1845 | ± | 17 | 11.46 |
| D2_098 | 0.09 | 838 | 88 | 0.11 | 4.09 | ± | 0.05 | 0.1139 | ± | 0.0011 | 1409.6 | ± | 14.8 | 1373.2 | ± | 14.5 | 1863 | ± | 17 | 24.34 |
| D2_099 | 0.00 | 548 | 424 | 0.79 | 89.91 | ± | 1.95 | 0.0586 | ± | 0.0026 | 71.3 | ± | 1.5 | 70.3 | ± | 1.5 | 552 | ± | 96 | 87.08 |
| D2_100 | 0.00 | 505 | 179 | 0.36 | 55.54 | ± | 0.87 | 0.0583 | ± | 0.0026 | 115.0 | ± | 1.8 | 113.6 | ± | 1.8 | 542 | ± | 94 | 78.78 |
| D2_101 | 0.00 | 490 | 118 | 0.25 | 3.01 | ± | 0.03 | 0.1141 | ± | 0.0011 | 1849.6 | ± | 18.4 | 1847.8 | ± | 18.5 | 1866 | ± | 17 | 0.88 |
| D2_102 | 0.00 | 148 | 150 | 1.04 | 6.09 | ± | 0.08 | 0.0751 | ± | 0.0018 | 980.3 | ± | 12.6 | 976.7 | ± | 12.7 | 1072 | ± | 46 | 8.56 |
| D2_103 | 0.14 | 446 | 170 | 0.39 | 3.49 | ± | 0.04 | 0.1358 | ± | 0.0015 | 1625.9 | ± | 16.5 | 1566.5 | ± | 16.1 | 2175 | ± | 19 | 25.25 |
| D2_104 | 0.00 | 1124 | 425 | 0.39 | 2.04 | ± | 0.02 | 0.1950 | ± | 0.0014 | 2574.6 | ± | 25.0 | 2519.0 | ± | 24.8 | 2786 | ± | 12 | 7.59 |
| D2_105 | 0.00 | 1374 | 1315 | 0.98 | 14.24 | ± | 0.18 | 0.0787 | ± | 0.0010 | 437.6 | ± | 5.4 | 425.5 | ± | 5.2 | 1166 | ± | 24 | 62.47 |
| D2_106 | 0.00 | 1069 | 810 | 0.78 | 3.96 | ± | 0.05 | 0.1018 | ± | 0.0010 | 1452.2 | ± | 16.7 | 1436.3 | ± | 16.6 | 1657 | ± | 18 | 12.36 |
| D2_107 | 0.00 | 536 | 334 | 0.64 | 6.86 | ± | 0.09 | 0.0682 | ± | 0.0009 | 877.6 | ± | 10.7 | 877.6 | ± | 10.7 | 876 | ± | 28 | -0.18 |
| D2_108 | 0.00 | 425 | 273 | 0.66 | 3.52 | ± | 0.04 | 0.1027 | ± | 0.0011 | 1612.8 | ± | 16.0 | 1607.4 | ± | 16.0 | 1674 | ± | 20 | 3.66 |
| D2_109 | 0.00 | 398 | 220 | 0.57 | 12.23 | ± | 0.18 | 0.0555 | ± | 0.0013 | 506.5 | ± | 7.3 | 506.5 | ± | 7.3 | 431 | ± | 50 | -17.53 |
| D2_110 | 0.00 | 510 | 351 | 0.71 | 11.43 | ± | 0.14 | 0.0580 | ± | 0.0011 | 540.8 | ± | 6.3 | 540.8 | ± | 6.3 | 532 | ± | 41 | -1.65 |
| D2_111 | 1.22 | 101 | 75 | 0.77 | 63.35 | ± | 2.39 | 0.0589 | ± | 0.0130 | 101.0 | ± | 3.8 | 99.6 | ± | 3.6 | 565 | ± | 419 | 82.13 |
| D2_112 | 0.00 | 526 | 99 | 0.19 | 2.62 | ± | 0.03 | 0.1370 | ± | 0.0011 | 2086.6 | ± | 20.3 | 2070.7 | ± | 20.3 | 2191 | ± | 14 | 4.77 |
| D2_113 | 0.79 | 230 | 216 | 0.96 | 3.81 | ± | 0.05 | 0.0915 | ± | 0.0026 | 1501.1 | ± | 17.5 | 1505.3 | ± | 17.4 | 1458 | ± | 54 | -2.96 |
| D2_114 | 0.00 | 314 | 78 | 0.25 | 2.96 | ± | 0.03 | 0.1148 | ± | 0.0011 | 1877.8 | ± | 18.8 | 1877.8 | ± | 18.8 | 1878 | ± | 18 | 0.01 |
| D2_115 | 0.00 | 98 | 53 | 0.56 | 45.74 | ± | 1.38 | 0.0676 | ± | 0.0055 | 139.4 | ± | 4.2 | 136.2 | ± | 4.2 | 858 | ± | 161 | 83.75 |
| D2_116 | 0.40 | 309 | 148 | 0.49 | 6.10 | ± | 0.07 | 0.0729 | ± | 0.0019 | 978.7 | ± | 10.5 | 977.6 | ± | 10.5 | 1011 | ± | 53 | 3.20 |
| D2_117 | 0.02 | 329 | 247 | 0.77 | 53.37 | ± | 1.05 | 0.0552 | ± | 0.0055 | 119.7 | ± | 2.3 | 118.7 | ± | 2.3 | 421 | ± | 210 | 71.57 |
| D2_118 | 0.00 | 388 | 101 | 0.27 | 12.73 | ± | 0.18 | 0.0634 | ± | 0.0014 | 487.3 | ± | 6.6 | 483.5 | ± | 6.6 | 724 | ± | 48 | 32.69 |
| D2_119 | 0.00 | 166 | 74 | 0.46 | 2.91 | ± | 0.04 | 0.1155 | ± | 0.0015 | 1901.8 | ± | 22.1 | 1901.8 | ± | 22.1 | 1889 | ± | 23 | -0.68 |
| Errors are 1-sigma; Pbc and Pb* indicate the common and radiogenic portions, respectively. | | | | | | | | | | | |  |  |  |  |  |  |  |  |  |
| (1) Common Pb corrected by assuming 206Pb/238U-208Pb/232Th age-concordance | | | | | | | | | | |  |  |  |  |  |  |  |  |  |  |
| (2) Common Pb corrected by assuming 206Pb/238U-207Pb/235U age-concordance | | | | | | | | | | |  |  |  |  |  |  |  |  |  |  |
| (3) The degree of discordance for an analyzed spot indicates the chronological difference between the two ages determined by Pb–Pb and U–Pb methods, and is defined as {1-(238U/206Pb* age)/(207Pb*/206Pb* age)}×100 (%) (e.g., Song et al., 1996). | | | | | | | | | | | | | | | | | | | | |
